# Supplementary material for: Antioxidant Activity of the Lignins Derived from Fluidized-Bed Fast Pyrolysis
Source: Molecules. 2017 Mar 1;22(3):372. doi: 10.3390/molecules22030372 (PMC6155384; doi:10.3390/molecules22030372)
Supplement: Supplementary file 1 [file molecules-22-00372-s001.pdf]

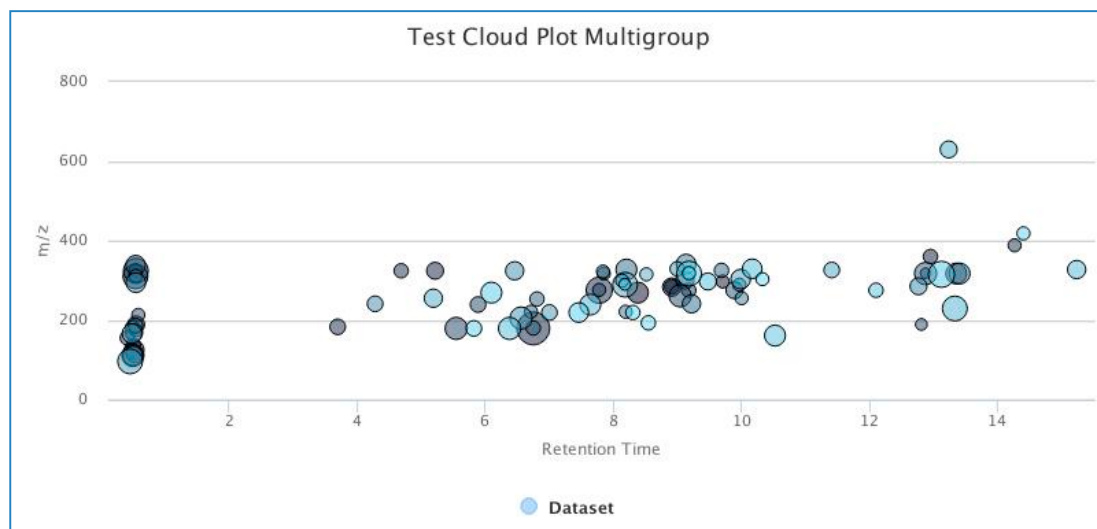

**Figure S1.** Test cloud plot of metabolite features, the level of which varies significantly ( $p < 0.01$ ) between pyrolytic lignins derived from fast pyrolysis. The metabolite features are represented by bubbles on the cloud plot depending upon their retention time ( $x$ -axis) and  $m/z$  ( $y$ -axis). Each bubble represents a metabolite feature, where the size of the bubble denotes its intensity, and the colour of each bubble (from light blue to dark grey), indicates its statistical significance ( $p < 0.01$ ).
